# Supplementary material for: Supraclavicular Approach of Lobectomy Improves Quality of Life for Patients With Unilateral Papillary Thyroid Microcarcinoma: A Prospective Cohort Study
Source: Frontiers journal article supplement (doi:10.3389/fendo.2021.766444), 2022-01-04
Supplement: Data_Sheet_1.PDF [file Data_Sheet_1.PDF]

**Patient Initials** \_\_\_\_\_ **Date of Birth:** \_\_\_\_/\_\_\_\_/\_\_\_\_ **Patkey:** \_\_\_\_\_**Surgeon Name:** \_\_\_\_\_ **Date:** \_\_\_\_\_**Examination Period:** \_\_\_\_\_ Postop 3 months \_\_\_\_\_ Postop 12 months

---

**SF-12®:**

This information will help your doctors keep track of how you feel and how well you are able to do your usual activities. Answer every question by placing a check mark on the line in front of the appropriate answer. It is not specific for arthritis. If you are unsure about how to answer a question, please give the best answer you can and make a written comment beside your answer.

1. In general, would you say your health is:

\_\_\_\_\_ Excellent (1)  
\_\_\_\_\_ Very Good (2)  
\_\_\_\_\_ Good (3)  
\_\_\_\_\_ Fair (4)  
\_\_\_\_\_ Poor (5)

The following two questions are about activities you might do during a typical day. Does YOUR HEALTH NOW LIMIT YOU in these activities? If so, how much?

2. MODERATE ACTIVITIES, such as moving a table, pushing a vacuum cleaner, bowling, or playing golf:

\_\_\_\_\_ Yes, Limited A Lot (1)  
\_\_\_\_\_ Yes, Limited A Little (2)  
\_\_\_\_\_ No, Not Limited At All (3)

3. Climbing SEVERAL flights of stairs:

\_\_\_\_\_ Yes, Limited A Lot (1)  
\_\_\_\_\_ Yes, Limited A Little (2)  
\_\_\_\_\_ No, Not Limited At All (3)

During the PAST 4 WEEKS have you had any of the following problems with your work or other regular activities AS A RESULT OF YOUR PHYSICAL HEALTH?

4. ACCOMPLISHED LESS than you would like:

\_\_\_\_\_ Yes (1)  
\_\_\_\_\_ No (2)

5. Were limited in the KIND of work or other activities:

\_\_\_\_\_ Yes (1)  
\_\_\_\_\_ No (2)

**Surgeon Initials** \_\_\_\_\_ **Date:** \_\_\_\_\_

**SF-12® Cont'd:**

---

During the PAST 4 WEEKS, were you limited in the kind of work you do or other regular activities AS A RESULT OF ANY EMOTIONAL PROBLEMS (such as feeling depressed or anxious)?

6. ACCOMPLISHED LESS than you would like:

- ☐ Yes (1)  
☐ No (2)

7. Didn't do work or other activities as CAREFULLY as usual:

- ☐ Yes (1)  
☐ No (2)

8. During the PAST 4 WEEKS, how much did PAIN interfere with your normal work (including both work outside the home and housework)?

- ☐ Not At All (1)  
☐ A Little Bit (2)  
☐ Moderately (3)  
☐ Quite A Bit (4)  
☐ Extremely (5)

The next three questions are about how you feel and how things have been DURING THE PAST 4 WEEKS. For each question, please give the one answer that comes closest to the way you have been feeling. How much of the time during the PAST 4 WEEKS –

9. Have you felt calm and peaceful?

- ☐ All of the Time (1)  
☐ Most of the Time (2)  
☐ A Good Bit of the Time (3)  
☐ Some of the Time (4)  
☐ A Little of the Time (5)  
☐ None of the Time (6)

Surgeon Initials \_\_\_\_\_ Date: \_\_\_\_\_

**SF-12® Cont'd:**

---

10. Did you have a lot of energy?
- \_\_\_\_\_ All of the Time (1)  
\_\_\_\_\_ Most of the Time (2)  
\_\_\_\_\_ A Good Bit of the Time (3)  
\_\_\_\_\_ Some of the Time (4)  
\_\_\_\_\_ A Little of the Time (5)  
\_\_\_\_\_ None of the Time (6)
11. Have you felt downhearted and blue?
- \_\_\_\_\_ All of the Time (1)  
\_\_\_\_\_ Most of the Time (2)  
\_\_\_\_\_ A Good Bit of the Time (3)  
\_\_\_\_\_ Some of the Time (4)  
\_\_\_\_\_ A Little of the Time (5)  
\_\_\_\_\_ None of the Time (6)
12. During the PAST 4 WEEKS, how much of the time has your PHYSICAL HEALTH O R EMOTIONAL PROBLEMS interfered with your social activities (like visiting with friends, relatives, etc.)?
- \_\_\_\_\_ All of the Time (1)  
\_\_\_\_\_ Most of the Time (2)  
\_\_\_\_\_ A Good Bit of the Time (3)  
\_\_\_\_\_ Some of the Time (4)  
\_\_\_\_\_ A Little of the Time (5)  
\_\_\_\_\_ None of the Time (6)

Surgeon Signature \_\_\_\_\_

Date \_\_\_\_\_
